# Supplementary material for: Structure of a bacterial Rhs effector exported by the type VI secretion system
Source: PLoS Pathog. 2022 Jan 5;18(1):e1010182. doi: 10.1371/journal.ppat.1010182 (PMC8765631; doi:10.1371/journal.ppat.1010182)
Supplement: S1 Table — (DOCX) [file ppat.1010182.s010.docx]

| Organism | Genotype | Description | Reference |
| --- | --- | --- | --- |
| *P. protegens* Pf-5 | wild-type |  | Paulsen et al., Nature Biotechnology, 2005[1] |
|  | PFL_6096_D1324N | Expresses RhsA D1324N | This study |
|  | PFL_6096_D1346N | Expresses RhsA D1346N | This study |
|  | PFL_6079 attB::*lacZ*, TetR | *pppA* deletion, constitutive *lacZ* expression, TetR | Ahmad et al., eLife, 2020[2] |
|  | PFL_6079 PFL_6096 PFL_6097 attB::lacZ, TetR | *pppA* *rhsA* *rhsI* deletion, constitutive *lacZ* expression, TetR | Ahmad et al., eLife, 2020[2] |
| *E. coli* SM10 λpir | *thi thr leu tonA lac Y supE recA*::RP4-2-Tc::Mu | Conjugation strain | BioMedal LifeScience |
| *E. coli* XL-1 Blue | *recA1* *endA1* *gyrA96 thi-1 hsdR17 supE44 relA1 lac* [F´ *proAB lacI*q Z∆*M15* Tn*10* (TetR)] | Cloning strain | Novagen |
| *E. coli* BL21 (DE3) CodonPlus | F- ompT gal dcm lon hsdSB(rB- mB-) λ(DE3) pLysS(cmR) | Protein expression strain | Novagen |

**References**

1. Paulsen IT, Press CM, Ravel J, Kobayashi DY, Myers GSA, Mavrodi D V., et al. Complete genome sequence of the plant commensal Pseudomonas fluorescens Pf-5. Nat Biotechnol. 2005;23: 873–878. doi:10.1038/nbt1110

2. Ahmad S, Tsang KK, Sachar K, Quentin D, Tashin TM, Bullen NP, et al. Structural basis for effector transmembrane domain recognition by type VI secretion system chaperones. Elife. 2020;9: 1–29. doi:10.7554/eLife.62816
